# Supplementary material for: COLQ variant associated with Devon Rex and Sphynx feline hereditary myopathy
Source: PubMed Central journal article supplement — Anim Genet. 2015 Sep 16;46(6):711–5. doi: 10.1111/age.12350 (PMC4637250; doi:10.1111/age.12350), 2015-09-16
Supplement: NIHMS716964-supplement-Supp_TableS1-S3___FigureS1-S3.pdf [file NIHMS716964-supplement-Supp_TableS1-S3___FigureS1-S3.pdf]

**Figure S1.** Haplotype comparison between cases and controls in the region of association. Presented on top is the homozygous haplotype in the 7 cases and below the 19 controls Devon Rex, from position 128,192,494 to 131,992,072 on chromosome C2.

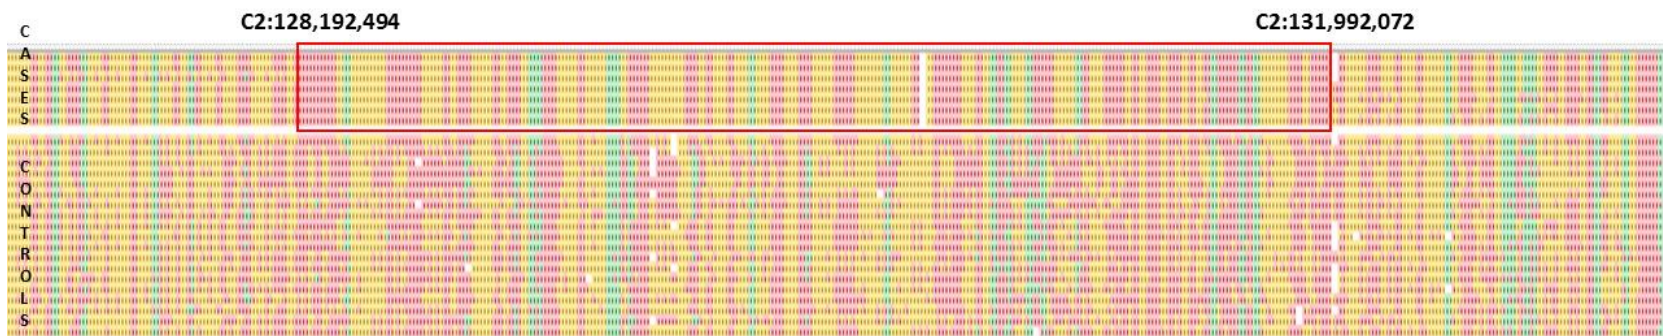

**Figure S2** *COLQ* CDS and protein sequence. Presented are the feline wild-type and mutated CDS and amino acid *COLQ* sequences. Boldface indicates the base substitution in the CDS (c.1190G>A) and the associated amino acid substitution (p.397C>Y).

CDS wild-type

ATGGTTGTCCTGAATCCAGTGACTTTGGGAATCTATCTGCAGCTTTTCTTCCGCTTTATC

CDS mutated -----

Prot wild-type M V V L N P V T L G I Y L Q L F F R F I

Prot mutated - - - - -

CDS wild-type

GTGTCTCAGCCTACTTTCGTCAACAGCGTCTCCAATTCAGCAGCTTCCCCGGCCTG

CDS mutated -----

Prot wild-type V S Q P T F V N S V L P I S A A L P G L

Prot mutated - - - - -

CDS wild-type

GATCAGAAGAAGCGTGGCAGCCACAGAGCATGCTGCCTCCTGACGCCCCCTCCACCCCCG

CDS mutated -----

Prot wild-type D Q K K R G S H R A C C L L T P P P P P

Prot mutated - - - - -

CDS wild-type

CTGTTCCCACCACCATTCTTCAGAGGAGGCCGAAGCCTGCTTCTCTCCCCAGACATGAAG

CDS mutated -----

Prot wild-type L F P P P F F R G G R S L L L S P D M K

Prot mutated - - - - -

CDS wild-type

AATTCATCCTGGAAGTGGAGACCTCACAGTCCTCATGTGTGCAAGGATCACTCGGCTCC

CDS mutated -----

Prot wild-type N F I L E L E T S Q S S C V Q G S L G S

Prot mutated - - - - -

CDS wild-type

CCTGGGCCCCCTGGCCCCCAGGGTCCACCGGGACTTCCTGGCAAGATAGGACCAAAGGGA

CDS mutated -----

Prot wild-type P G P P G P Q G P P G L P G K I G P K G

Prot mutated - - - - -

CDS wild-type

GAAAAGGGGGAGCTTGGCCTACCAGGAAGAAAGGGTAGACCTGGCCCCCGGGTGTTCCT

CDS mutated -----

Prot wild-type E K G E L G L P G R K G R P G P P G V P

Prot mutated - - - - -

CDS wild-type  
GGCATGCCTGGGCCAGTCGGCCCTGAAGGACCCAGGGGTGAAAAAGGTGACCTGGGTGTG  
CDS mutated -----  
Prot wild-type G M P G P V G P E G P R G E K G D L G V  
Prot mutated - - - - -

CDS wild-type  
ATGGGCTTGCCAGGGTCAAGAGGACCAATGGGCTTCAAGGGCTACCCTGGATCCAGAGGG  
CDS mutated -----  
Prot wild-type M G L P G S R G P M G F K G Y P G S R G  
Prot mutated - - - - -

CDS wild-type  
GAAAAGGGATCCAGAGGTGAAAGGGGTGACTTGGGTCCCAAAGGAGAAAAGGGTTTCCCG  
CDS mutated -----  
Prot wild-type E K G S R G E R G D L G P K G E K G F P  
Prot mutated - - - - -

CDS wild-type  
GGATTTCTTGGAAATGTTGGGGCAGAAAGGTGAAATGGGTCCAAAGGGTGAGCCTGGGATA  
CDS mutated -----  
Prot wild-type G F P G M L G Q K G E M G P K G E P G I  
Prot mutated - - - - -

CDS wild-type  
GCAGGACACAGGGGACCCAGAGGAAGACCAGGAAAACGAGGCAAGCAGGGGCAGAAGGG  
A  
CDS mutated -----  
Prot wild-type A G H R G P R G R P G K R G K Q G Q K G  
Prot mutated - - - - -

CDS wild-type  
GATAGTGGAGTAATGGGCCCACCAGGCAAGCCTGGGCCTTCTGGTCAACCTGGCCGTCCA  
CDS mutated -----  
Prot wild-type D S G V M G P P G K P G P S G Q P G R P  
Prot mutated - - - - -

CDS wild-type  
GGTCCCCCAGGCCCCCGGGCCCCCGATCCGCAGGACAACCTTGTGATGGGACCCAAAGGG  
CDS mutated -----  
Prot wild-type G P P G P P G P R S A G Q L V M G P K G  
Prot mutated - - - - -

CDS wild-type  
GACAGAGGATTTCCCGGGCCTCCAGGAAGTTGTCTTTGTGGAACCCCTACGAATGTGAAT  
CDS mutated -----  
Prot wild-type D R G F P G P P G S C L C G T P T N V N  
Prot mutated - - - - -

CDS wild-type  
AACCCTTCCTACAGGGAATCCATGTATGGGTCCAGCTCCCCTCATGTTCTGTGATTTTT  
CDS mutated -----  
Prot wild-type N P S Y R E S M Y G S S S P H V P V I F  
Prot mutated - - - - -

CDS wild-type  
GTGGTCAACAACCAGGAGGAGCTCGAGAGGCTGAACACCCAAAACGCCATTGCCTTCCGC  
CDS mutated -----  
Prot wild-type V V N N Q E E L E R L N T Q N A I A F R  
Prot mutated - - - - -

CDS wild-type  
AAAGATCAGAGATCTCTGTACTTCAAGGACAGCCTTGGCTGGCTCCCCATCCAGGTGACC  
CDS mutated -----  
Prot wild-type K D Q R S L Y F K D S L G W L P I Q V T  
Prot mutated - - - - -

CDS wild-type  
CCTTCCACCCTCTGGACTATACTGTGGACCACCGTGGCTCCTGCGGGGATGGAGTCCTG  
CDS mutated -----  
Prot wild-type P F H P L D Y T V D H R G S C G D G V L  
Prot mutated - - - - -

CDS wild-type  
CAGCCCGGGGAGGAGTGTGATGACGGAATGATGACGTGGGTGACAGCTGCATCAGCTGT  
CDS mutated -----A-----  
Prot wild-type Q P G E E C D D G N D D V G D S C I S C  
Prot mutated - - - - - Y - - -

CDS wild-type  
CACCGGGCCTACTGTGGAGATGGTCACCAGCACAAGGGAGTGGAGGACTGCGACGGCTCT  
CDS mutated -----  
Prot wild-type H R A Y C G D G H Q H K G V E D C D G S  
Prot mutated - - - - -

CDS wild-type  
GACTTTGGCCACCTGACCTGCGAGACCTATCTCCCTGGGTTCATATGGGGACCTGCAGTGC  
CDS mutated -----  
Prot wild-type D F G H L T C E T Y L P G S Y G D L Q C  
Prot mutated - - - - -

CDS wild-type ACCCCCTACTGCTACATCGACTCCACGTCCTGCCGCTACTTCACGTGA  
CDS mutated -----  
Prot wild-type T P Y C Y I D S T S C R Y F T X  
Prot mutated - - - - -

**Figure S3.** Decremental response to repetitive nerve stimulation at 3 Hz in an affected Sphynx cat. Sequential extensor digitorum brevis lateralis m. CMAP following peroneal n. stimulation at the hock: a) before edrophonium administration, b) after edrophonium administration.

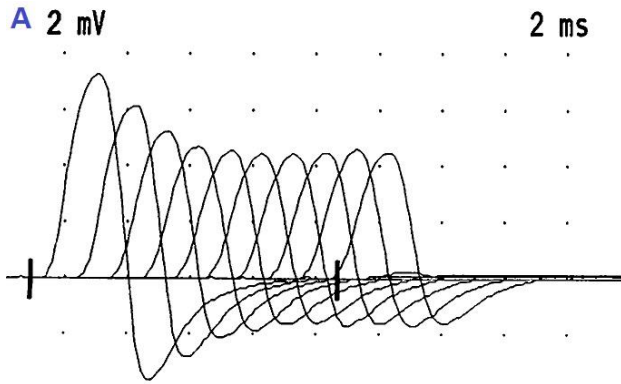

FOOT SWITCH: READY / STIMULATE / STOP  
 STIM.MODE: TRAIN / SINGLE

|            |          |               |        |
|------------|----------|---------------|--------|
| STIM FREQ: | 3 Hz     | NO. IN TRAIN: | 10     |
| STIM DUR:  | 0.2 ms   | STIM RJCT:    | 0.5 ms |
| TIME:      | 11:07:40 | STOP WATCH:   | 0:09   |
| COMMENT:   |          |               |        |

| POT NO. | P-P AMP mV | AMP. DECR % | AREA mVms | AREA DECR % | STIM. LEVEL |
|---------|------------|-------------|-----------|-------------|-------------|
| 1       | 10.96      | 0           | 18.80     | 0           | 1.6mA       |
| 2       | 9.05       | 17          | 15.60     | 17          | 1.6mA       |
| 3       | 7.46       | 32          | 12.90     | 31          | 1.6mA       |
| 4       | 6.66       | 39          | 11.50     | 39          | 1.6mA       |
| 5       | 6.26       | 43          | 10.90     | 42          | 1.6mA       |
| 6       | 6.14       | 44          | 10.60     | 44          | 1.6mA       |
| 7       | 6.20       | 43          | 10.60     | 44          | 1.6mA       |
| 8       | 6.18       | 44          | 10.70     | 43          | 1.6mA       |
| 9       | 6.39       | 42          | 10.90     | 42          | 1.6mA       |
| 10      | 6.15       | 44          | 10.70     | 43          | 1.6mA       |

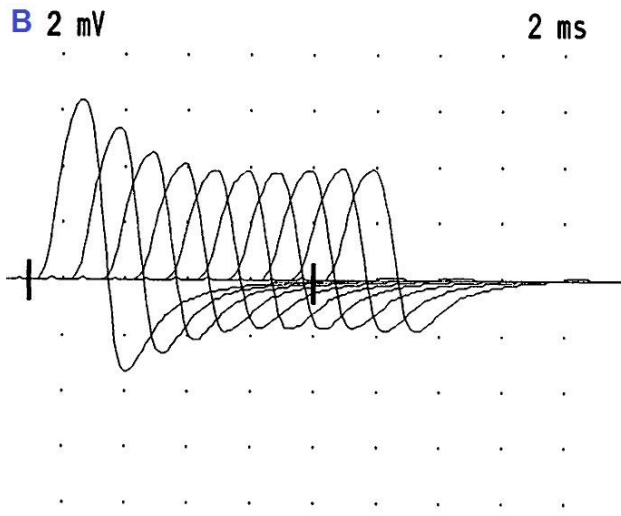

FOOT SWITCH: READY / STIMULATE / STOP  
 STIM.MODE: TRAIN / SINGLE

|            |          |               |        |
|------------|----------|---------------|--------|
| STIM FREQ: | 3 Hz     | NO. IN TRAIN: | 10     |
| STIM DUR:  | 0.2 ms   | STIM RJCT:    | 0.5 ms |
| TIME:      | 11:58:09 | STOP WATCH:   | 0:27   |
| COMMENT:   |          |               |        |

| POT NO. | P-P AMP mV | AMP. DECR % | AREA mVms | AREA DECR % | STIM. LEVEL |
|---------|------------|-------------|-----------|-------------|-------------|
| 1       | 9.77       | 0           | 14.80     | 0           | 1.5mA       |
| 2       | 8.07       | 17          | 12.10     | 18          | 1.5mA       |
| 3       | 6.79       | 31          | 10.10     | 32          | 1.5mA       |
| 4       | 6.03       | 38          | 9.11      | 38          | 1.5mA       |
| 5       | 5.68       | 42          | 8.61      | 42          | 1.5mA       |
| 6       | 5.67       | 42          | 8.65      | 42          | 1.5mA       |
| 7       | 5.65       | 42          | 8.53      | 42          | 1.5mA       |
| 8       | 5.69       | 42          | 8.60      | 42          | 1.5mA       |
| 9       | 5.81       | 41          | 8.80      | 41          | 1.5mA       |
| 10      | 5.78       | 41          | 8.86      | 40          | 1.5mA       |

**Table S1.** COLQ c.1190G>A genotypes in domestic cat breeds

| Type*           | Population           | Lab | No.        | Wildtype<br>(CC) | Carrier<br>(CT) | Affected<br>(TT) |
|-----------------|----------------------|-----|------------|------------------|-----------------|------------------|
| <b>Unbiased</b> | Abyssinian           | MU  | 8          | 8                | 0               | 0                |
|                 | American Shorthair   | MU  | 8          | 8                | 0               | 0                |
|                 | Bengal               | MU  | 7          | 7                | 0               | 0                |
|                 | Birman               | MU  | 7          | 7                | 0               | 0                |
|                 | British              | MU  | 6          | 6                | 0               | 0                |
|                 | Burmese              | MU  | 4          | 4                | 0               | 0                |
|                 | Cornish Rex          | MU  | 8          | 8                | 0               | 0                |
|                 | Chartreux            | MU  | 6          | 6                | 0               | 0                |
|                 | Devon Rex            | MU  | 88         | 82               | 6               | 0                |
|                 | Egyptian Mau         | MU  | 7          | 7                | 0               | 0                |
|                 | Japanese Bobtail     | MU  | 7          | 7                | 0               | 0                |
|                 | Khao Manee           | MU  | 1          | 1                | 0               | 0                |
|                 | Korat                | MU  | 7          | 7                | 0               | 0                |
|                 | Maine Coon           | MU  | 8          | 8                | 0               | 0                |
|                 | Manx                 | MU  | 5          | 5                | 0               | 0                |
|                 | Norwegian Forest Cat | MU  | 7          | 7                | 0               | 0                |
|                 | Ocicat               | MU  | 7          | 7                | 0               | 0                |
|                 | Oriental             | MU  | 5          | 5                | 0               | 0                |
|                 | Persian              | MU  | 7          | 7                | 0               | 0                |
|                 | Ragdoll              | MU  | 5          | 5                | 0               | 0                |
|                 | Russian Blue         | MU  | 5          | 5                | 0               | 0                |
|                 | Siamese              | MU  | 6          | 6                | 0               | 0                |
|                 | Siberian             | MU  | 7          | 7                | 0               | 0                |
|                 | Sphynx               | MU  | 98         | 98               | 0               | 0                |
|                 | Tonkinese            | MU  | 6          | 6                | 0               | 0                |
|                 | Turkish Angora       | MU  | 6          | 6                | 0               | 0                |
|                 | Turkish Van          | MU  | 2          | 2                | 0               | 0                |
|                 | Random Bred          | MU  | 16         | 16               | 0               | 0                |
| Sub-total       | 28 Breeds            | MU  | 354        | 348              | 6               | 0                |
|                 | Devon Rex            | UM  | 20         | 20               | 0               | 0                |
|                 | Sphynx               | UM  | 20         | 20               | 0               | 0                |
| Sub-total       | 2 Breeds             | UM  | 40         | 40               | 0               | 0                |
|                 | Devon Rex            | VGL | 94         | 92               | 2               | 0                |
|                 | Sphynx               | VGL | 99         | 98               | 1               | 0                |
| Subtotal        | 2 Breeds             | VGL | 193        | 190              | 3               | 0                |
| <b>Biased</b>   | Devon Rex            | MU  | 39         | 17               | 5               | 17               |
|                 | Sphynx               | MU  | 1          | 0                | 0               | 1                |
| <b>Totals</b>   | 28 breeds            |     | <b>627</b> | <b>595</b>       | <b>14</b>       | <b>18</b>        |

\*Type implies if the cat samples were ‘biased’ because they were collected as part of the disease study versus ‘unbiased’ because the laboratory conducted a population screen of samples submitted for other genetic testing. Biased affected cats include the cats from all three publications (Malik *et al.* 1993; Shelton *et al.* 2007; Martin *et al.* 2008). Four of five sampled cats from Malik *et al.* (1992) were successfully genotyped from formalin-fixed paraffin-embedded muscle samples. MU – Lyons laboratory, University of Missouri; VGL – Veterinary Genetics Laboratory, UC Davis; UM implies samples tested at the University of Milan.

**Table S2.** WGS variants identified in 20x coverage of an affected Devon Rex.

| Variant  |                         | Analysis performed to prioritize variants** |             |                |
|----------|-------------------------|---------------------------------------------|-------------|----------------|
| Impact*  | Functional Class        | WGS Cat                                     | Segregation | GWAS haplotype |
|          |                         | High                                        | Stop gain   | 296            |
|          | Start / Stop loss       | 56                                          | 4           | -              |
|          | Splice donor / acceptor | 1,350                                       | 43          | -              |
|          | Exon deletion           | 2                                           | -           | -              |
|          | Frameshift              | 3,013                                       | 69          | -              |
|          | Rare amino acid         | -                                           | -           | -              |
| Moderate | Codon alteration        | 577                                         | 35          | -              |
|          | Missense                | 22,905                                      | 820         | 5              |
|          | Splice branch           | -                                           | -           | -              |
|          | 5' or 3' UTR Deletion   | -                                           | -           | -              |
| Low      |                         | 41,926                                      | 1,301       | 8              |
| Modifier |                         | 11,646,620                                  | 535,250     | 1,570          |

\*Variant impact as defined by [http://snpeff.sourceforge.net/SnpEff\\_manual.html#eff](http://snpeff.sourceforge.net/SnpEff_manual.html#eff). \*\*Feline reference genome sequence (V6.2) is included in the analyses. GWAS haplotype indicates the variants within the haplotype that was identified via the GWAS. Effect counts are higher than variant counts because a given variant can potentially affect both the flanking upstream and downstream genes. The full genome sequence of this Devon Rex cat is under submission to the NCBI SRA database (<http://www.ncbi.nlm.nih.gov/sra>) and the variant has been submitted to dbSNP.

**Table S3.** PCR primers used for genotyping *COLQ* variant in cats.

| <b>Assay</b>         | <b>5' Primer (5' – 3')</b> | <b>3' Primer (5' – 3')</b>  |
|----------------------|----------------------------|-----------------------------|
| <b>ASP (VGL) *</b>   | agtcagcattggcctgaatg       | atgacgtgggtgacagttg         |
|                      |                            | gatgacgtgggtgacagata        |
| <b>MU sequencing</b> | tgatatgcgtgggcagtaaaaagt   | cctagtaactgtcctgtgtttctgtgg |

\*ASP indicates allele specific PCR (reverse primers specific for wild-type or variant allele). The 5' primer is generally labelled with a fluorescent dye.
